1           Patterns of vascular access among chronic kidney disease patients on maintenance  
2           hemodialysis at Muhimbili National Hospital. A single centre cross-sectional study

3

4   Daniel Msilanga<sup>1, 2</sup>, Jacqueline Shoo<sup>1,2\*</sup>, Jonathan Mngumi<sup>1,2\*</sup>

5

6

7   Affiliations:

8   <sup>1</sup>Renal Unit, Department of Internal Medicine, Muhimbili National Hospital, Dar es Salaam,

9   Tanzania

10   <sup>2</sup>School of Clinical Medicine, College of Medicine, Muhimbili University of Health and Allied

11   Sciences, Dar es Salaam, Tanzania

12

13   Corresponding author: [pascodanny@gmail.com](mailto:pascodanny@gmail.com)

14   \* These authors contributed equally for this work

15

## 16 **Abstract**

17 Background: Hemodialysis access profoundly impacts the quality of care for chronic kidney  
18 disease (CKD) patients worldwide, with arteriovenous fistulas (AVFs) preferred for superior  
19 outcomes. Despite global guidelines, Sub-Saharan Africa, including Tanzania, faces challenges, as  
20 it relies heavily on nontunneled central venous catheters (CVCs) due to accessibility and financial  
21 constraints. We aimed to describe the pattern of vascular access use among CKD patients on  
22 maintenance hemodialysis at Muhimbili National Hospital.

23 Methods: A cross-sectional study to describe the pattern of vascular access among patients with  
24 CKD on maintenance hemodialysis therapy. Descriptive statistics were used to summarize the  
25 baseline characteristics and patterns of vascular access. Our study received ethical clearance  
26 from the Muhimbili National Hospital Research Ethics Committee (Ref:  
27 MNH/IRB/VOL.1/2024/005). All consent forms were written and provided in English or Swahili.

28 Results: We analysed 200 study participants, with a mean age of 53.3 (14.5) years. Almost all  
29 participants initiated hemodialysis with nontunneled central venous catheters (95.5%). A  
30 substantial portion continued to use nontunneled CVCs (25.5%), with some transitioning to  
31 tunneled CVCs (39.5%) or AVFs (35%). The mean (SD) duration to use nontunneled CVCs before  
32 transitioning to tunneled or AVF were 7.1 (2.1) months. Among patients with multiple  
33 nontunneled catheters, catheter dislodgement was the main indication for catheter  
34 replacement.

35 Conclusion:

36 Our study highlights the prevalent use of nontunneled central venous catheters (CVCs) as the  
37 primary vascular access method for CKD patients undergoing hemodialysis at Muhimbili National  
38 Hospital, Tanzania. These findings underscore the urgent need for analysis of the cost associated  
39 with nontunneled catheter reliance and interventions to improve access to AVFs and enhance  
40 vascular access management, ultimately optimizing patient outcomes in resource-limited  
41 settings.

42 Key words: Chronic kidney disease, hemodialysis vascular access, Tanzania

43

#### 44 **Introduction**

45 Hemodialysis access is a critical component affecting the quality of care for chronic kidney disease  
46 (CKD) patients in need of renal replacement therapy (1,2). Worldwide, the Kidney Disease:  
47 Improving Global Outcomes (KDIGO) guidelines and the Fistula First Initiative advocate for  
48 arteriovenous fistulas (AVFs) as the preferred vascular access method due to their superior long-  
49 term outcomes and overall survival (3,4). Despite these recommendations, the problem of  
50 hemodialysis access remains substantial, with disparities observed in access patterns across  
51 different regions (5).

52 Adequate vascular access is pivotal for comprehensive care in chronic kidney disease (CKD)  
53 patients undergoing hemodialysis (1). Ideally, a fistula should be established six months prior to  
54 treatment initiation in suitable cases (2,6). Tunneled catheters are reserved for patients with  
55 poor AVF outcomes due to vascular issues (7,8), while nontunneled central venous catheters

56 (CVCs) are discouraged for chronic use, mainly due to infection risks and vessel damage (9,10).  
57 Despite these recommendations, in sub-Saharan Africa, nontunneled CVCs are commonly used  
58 due to their accessibility and cost, especially in emergency situations where immediate dialysis is  
59 necessary, which often occurs out of pocket (1,11)

60 Like in many other parts of sub-Saharan Africa, hemodialysis is the mainstay kidney replacement  
61 therapy for most, while kidney transplantation remains a limited option in Tanzania (12). Patients  
62 undergoing maintenance hemodialysis in Tanzania face challenges accessing appropriate  
63 vascular access due to the limited availability of centers offering tunneled dialysis central venous  
64 catheter (CVC) placement and arteriovenous fistula creation, compounded by financial  
65 constraints (5,11). As a result, many patients rely on nontunneled CVCs, which increases the risk  
66 of vascular complications and contributes to morbidity and mortality. This study aimed to  
67 describe the current practices and patterns of vascular access among CKD patients on  
68 maintenance hemodialysis, shedding light on current practices and identifying gaps in optimal  
69 vascular access management.

71 **Methodology:**

72 A cross-sectional study conducted at the Muhimbili National Hospital (MNH) hemodialysis units  
73 from 10<sup>t</sup> April 2024 to 15<sup>th</sup> May 2024. The MNH is a tertiary-level public health facility with a  
74 1500-bed capacity. The MNH has 50 hemodialysis machines and dialyzes between 100 and 130  
75 CKD patients per day.

76 Recruitment procedure: During each dialysis visit, patients were identified from the dialysis  
77 appointment registry and randomly selected using a rotary method. The study details, including  
78 the study's purpose, procedures, and potential risks and benefits, were explained to them, and  
79 they were invited to consent to participate in the study. Those who consented were included in  
80 the study. This process was repeated until the sample size was reached. Approximately half of  
81 the patients are covered by health insurance, whereas the remainder pay out-of-pocket for  
82 hemodialysis treatments. Due to financial constraints, almost all of those who are paying out-of-  
83 pocket are receiving dialysis therapy either twice or once weekly.

84 The data were collected through an interview-administered questionnaire. Selected clinical data,  
85 including comorbidities (diabetes/hypertension), frequency of hemodialysis treatments per  
86 week, and type of vascular access, were collected from the dialysis registry (a paper document).  
87 Vascular access type data included the type of initial access, anatomical location of vascular  
88 access, duration of access use, and current access, and to avoid the possibility of confusing  
89 dialysis access types, a physical examination of each patient was performed to ensure that proper  
90 vascular access was recorded. The outcome was the pattern of vascular access use during the  
91 course of dialysis therapy.

92 Data analysis: escriptive statistics were used to summarize the baseline characteristics and  
93 patterns of vascular access.

94 Authors Access to Study Participant Information and Confidentiality: All information related to  
95 study participants will remain confidential and will be identifiable only by codes known to the  
96 researcher. To ensure participant privacy, all personal identifiers will be replaced with unique  
97 codes. Only the primary researcher will have access to the code key linking participants to their  
98 data. This process will safeguard participant confidentiality throughout the study

99

100 Ethical approval: Ethical clearance was obtained from Muhimbili National Hospital, Clinical  
101 Research, Training and Consultancy Unit with reference number MNH/IRB/VOL.1/2024/005. All  
102 participants provided written informed consent before any study procedures are conducted. The  
103 consent form documents were written and provided in English and Swahili language.

104

105

106 **Results:**

107 Two hundred study participants were enrolled in this study. The mean age was 53.3 years (14.5),  
108 with almost half of the study participants being male (58.5%), unemployed (52.5%), under  
109 medical insurance (56%), and doing thrice weekly dialysis sessions (56.5%). Hypertension (46%)  
110 was the main etiology of CKD, followed by diabetes mellitus (30.5%). (Table 1)

111 Table 1: Demographic data (n=200)

|                                   | N (%)       |
|-----------------------------------|-------------|
| Mean age (years)                  | 53.3 (14.5) |
| Gender                            |             |
| Male                              | 117 (58.5)  |
| Female                            | 83 (41.5)   |
| Occupation                        |             |
| Unemployed                        | 105 (52.5)  |
| Retired                           | 48 (24.0)   |
| Employed                          | 47 (23.5)   |
| Payment modality for HD           |             |
| Insured                           | 112 (56.0)  |
| Uninsured (out-of-pocket payment) | 88 (44.0)   |
| Etiology of CKD                   |             |
| Hypertension                      | 92 (46.0)   |
| DM                                | 61 (30.5)   |

|                                           |            |
|-------------------------------------------|------------|
| HIV                                       | 15 (7.5)   |
| Glomerulonephritis                        | 14 (7.0)   |
| Unknown cause                             | 13 (6.5)   |
| Other causes                              | 5 (2.5)    |
| Weekly frequency of hemodialysis sessions |            |
| Three times per week                      | 113 (56.5) |
| Two times per week                        | 80 (40)    |
| Once per week                             | 7 (3.5)    |

112 CKD: Chronic kidney disease, DM: Diabetes mellitus, HD: Hemodialysis

113

114

115 Almost all study participants started hemodialysis therapy via a nontunneled central venous  
116 catheter (95.5%), and the rest had early arteriovenous fistulas (4.5%). Furthermore, a significant  
117 proportion of patients continued to rely on nontunneled central venous catheters as their access  
118 method (25.5%), while others transitioned to tunneled central venous catheters (39.5%) or  
119 arteriovenous fistulas (AVFs) (35%) (Table 2).

120

121 Table 2: Type of hemodialysis access (N=200)

|  |                            |
|--|----------------------------|
|  | Paying from pocket (N=200) |
|--|----------------------------|



| Type of access  | Initial access | Current access |
|-----------------|----------------|----------------|
| Nontunneled CVC | 191(95.5)      | 51(25.5)       |
| Tunneled CVC    | 0              | 79(39.5)       |
| AVF             | 9 (4.5)        | 70(35)         |

122 CVC: Central venous catheter, AVF: arteriovenous fistula

123

124 Among the subset of prevalent ESRD patients who used only nontunneled CVCs for dialysis  
 125 (25.5%), the mean duration of nontunneled CVC use was 7.1(2.1) months. A history of multiple  
 126 nontunneled CVC catheterizations was reported in 68.6% of patients, and dislodgement of the  
 127 catheter was the most common reason for recatheterization Table 3.

128

129 Table 3: Patients with nontunneled central venous catheters as the only access for hemodialysis  
 130 (N=51)

|                                                                  | N (%)     |
|------------------------------------------------------------------|-----------|
| Mean (SD) time of using nontunneled CVC for HD (Months)          | 7.1 (2.1) |
| Current site of nontunneled CVC                                  |           |
| Internal jugular vein                                            | 38 (74.0) |
| Femoral vein                                                     | 13 (26.0) |
| History of using more than one nontunneled CVC since start of HD |           |

|                                      |           |
|--------------------------------------|-----------|
| Yes                                  | 35 (68.6) |
| No                                   | 16 (31.4) |
| Mean nontunneled CVC used per person | 2.8       |
| Causes of changing nontunneled CVC   |           |
| Catheter dislodgement                | 17        |
| Purulent discharge from the catheter | 10        |
| Catheter clotted/poor blood flows    | 8         |

131

## 132 Discussion

133 Our study provides valuable insights into the status and vascular access practice patterns among  
134 patients with chronic kidney disease (CKD) undergoing maintenance hemodialysis therapy in  
135 Tanzania. Notably, nine out of ten study participants initiated hemodialysis therapy using  
136 nontunneled catheters. Subsequently, three-quarters of these participants transitioned to either  
137 tunnelled catheters or arteriovenous fistulas (AVFs), with a mean time to conversion from  
138 nontunnelled catheters of seven months. Additionally, a quarter of the participants continued to  
139 use nontunneled catheters for permanent dialysis access.

140

141 Vascular access serves as the lifeline for patients undergoing dialysis therapy (13,14). We found  
142 that almost all of the participants were initiated on hemodialysis therapy using nontunneled  
143 catheters. This trend mirrors findings reported in Kenya, Libya and Senegal, where more than  
144 80% of incident CKD patients started hemodialysis therapy with a nontunneled catheter as the  
145 initial vascular access (15,16)(17). However, this is contrary to the practice in most higher income  
146 countries (HICs), where CKD patients start hemodialysis therapy either by using a tunnelled CVC  
147 and converting to an AVF or starting with an AVF (18–20). Despite the reported high rates of  
148 morbidity and mortality, nontunneled CVCs remain an important type of initial hemodialysis  
149 access for the majority of advanced CKD patients at the time of initiation of hemodialysis in  
150 LMICs. Likely contributors to this practice pattern include limited predialysis care, late  
151 presentation necessitating urgent hemodialysis and lack of expertise for tunneled CVCs or AVF  
152 (10,21).

153 Almost a quarter continued to rely on nontunneled catheters for permanent access, with a  
154 prolonged mean duration of 7.1 months. Similar findings were reported in Kenya and Senegal  
155 (15,16), but the mean duration of nontunneled catheter use was longer in our setting than the 3  
156 months reported in other centers with the same economic settings (15,17). While nontunneled  
157 CVCs are employed as a temporary measure, their extended utilization raises major concerns  
158 regarding the associated risks, including infection, thrombosis, and mechanical complications  
159 leading to multiple admissions and high cost. A number of those who chronically utilized  
160 nontunneled CVCs had a history of multiple insertions. This highlights the challenges in  
161 maintaining vascular access with nontunneled catheters, increasing overall healthcare resource  
162 utilization, and increasing the cumulative risk of complications for patients.

163 Our study revealed the extensive reliance on nontunneled central venous catheters (CVCs) for  
164 hemodialysis among chronic kidney disease patients in Tanzania and similar settings with the  
165 same economic status and healthcare financing methods. This highlights the difficulty in  
166 accessing recommended vascular access options in resource-limited settings. The prolonged use  
167 of CVCs and frequent catheter insertions emphasize the need for improving access to  
168 arteriovenous fistulas (AVFs). Addressing these challenges is vital for minimizing infection and  
169 other complications and improving patient outcomes while reducing healthcare resource use.  
170 Targeted interventions and resource allocation are crucial for optimizing vascular access  
171 practices and improving care for hemodialysis patients in similar settings.

172 Limitation

173 While we provided an overview of the vascular access patterns among CKD patients on  
174 maintenance hemodialysis at MNH, we could not analyse potential factors influencing these  
175 patterns or their outcomes. Despite this limitation, our study sheds light on the significant burden  
176 of relying on nontunneled central venous catheters (CVCs) for hemodialysis in LMICs, such as  
177 Tanzania. In addition, our findings emphasize the need for further research to assess the costs  
178 associated with the prolonged use of nontunneled catheters and its complications.

179 Data availability statement

180 The datasets generated and/or analysed during the current study are available from the  
181 corresponding author on reasonable request. All data supporting the findings of this study are  
182 included within the article

183 Conflicts of interest

184 We declare no conflicts of interest.

185 Acknowledgements

186 We thank the Muhimbili National Hospital for approving the research and extend our deep  
187 gratitude to the patients who participated in the study.

188 Funding

189 The study was funded by the principal investigator; no external funding was obtained. The  
190 author(s) received no financial support for the research, authorship, or publication of this article.

191 **References**

- 192 1. Woo K, Lok CE. New insights into dialysis vascular access: What is the optimal vascular  
193 access type and timing of access creation in CKD and dialysis patients? *Clinical Journal of*  
194 *the American Society of Nephrology*. 2016;11(8):1487–94.
- 195 2. John T. Daugirdas. KDOQI clinical practice guideline for vascular access, *Handbook of*  
196 *Dialysis*. 2018;(April):1–163.
- 197 3. Rashad S. Barsoum, Christopher R. Blagg JB, Arogundade FA, Barsoum RS. CKD Prevention  
198 in Sub-Saharan Africa: A Call for Governmental, Nongovernmental, and Community  
199 Support. *American Journal of Kidney Diseases*. 2008;51(3):515–23.
- 200 4. Chan CT, Blankestijn PJ, Dember LM, Gallieni M, Harris DCH, Lok CE, et al. Dialysis  
201 initiation, modality choice, access, and prescription: conclusions from a Kidney Disease:  
202 Improving Global Outcomes (KDIGO) Controversies Conference. *Kidney Int*.  
203 2019;96(1):37–47.
- 204 5. Baharani J, Vincent L, Vachharajani TJ. Long-Term Dialysis Vascular Access in East Africa:  
205 Unique Challenges and Novel Solutions. *Kidney360*. 2023 Aug 1;4(8):1143–6.
- 206 6. Allon M, Zhang Y, Thamer M, Crews DC, Lee T. Trends in Vascular Access Among Patients  
207 Initiating Hemodialysis in the US. *JAMA Netw Open*. 2023 Aug 1;6(8):e2326458.
- 208 7. Clark E, Kappel J, MacRae J, Dipchand C, Hiremath S, Kiaii M, et al. Practical aspects of  
209 nontunneled and tunneled hemodialysis catheters. *Can J Kidney Health Dis*. 2016;3(1).
- 210 8. Faponle A, Olatise Olalekan O, Igbokwe M, Asaolu S. Outcomes of tunneled and  
211 nontunneled internal jugular catheters for hemodialysis at Zenith Medical and Kidney  
212 centre, Nigeria. *Nigerian Journal of Medicine*. 2020;29(3):455.

- 213 9. Clark E, Kappel J, MacRae J, Dipchand C, Hiremath S, Kiaii M, et al. Practical aspects of  
214 nontunneled and tunneled hemodialysis catheters. *Can J Kidney Health Dis.* 2016;3(1).
- 215 10. Hemachandar R. Analysis of vascular access in haemodialysis patients - Single center  
216 experience. *Journal of Clinical and Diagnostic Research.* 2015 Oct 1;9(10):OC01–4.
- 217 11. Ghimire A, Shah S, Okpechi IG, Ye F, Tungsanga S, Vachharajani T, et al. Global variability  
218 of vascular and peritoneal access for chronic dialysis. *Nephrology.* 2024 Mar 1;29(3):135–  
219 42.
- 220 12. Furia FF, Shoo J, Ruggajo PJ, Kilonzo K, Basu G, Yeates K, et al. Developing nephrology  
221 services in low income countries: A case of Tanzania. *BMC Nephrol.* 2019;20(1):1–9.
- 222 13. Lee T. Fistula First Initiative: Historical Impact on Vascular Access Practice Patterns and  
223 Influence on Future Vascular Access Care. *Cardiovasc Eng Technol.* 2017 Sep 1;8(3):244–  
224 54.
- 225 14. Lok CE, Huber TS, Lee T, Shenoy S, Yevzlin AS, Abreo K, et al. KDOQI Clinical Practice  
226 Guideline for Vascular Access: 2019 Update. *American Journal of Kidney Diseases.* 2020  
227 Apr 1;75(4):S1–164.
- 228 15. Kabinga SK, Kayima JK, McLigeyo SO, Ndungu JN. Hemodialysis vascular accesses in  
229 patients on chronic hemodialysis at the Kenyatta National Hospital in Kenya. *Journal of*  
230 *Vascular Access.* 2019 Nov 1;20(6):697–700.
- 231 16. Cisse MM KY, Seck SM GM, Ba S, Faye Maria LA. Problematic of Vascular Access for  
232 Hemodialysis in Sub-Saharan Africa: Experience of Dakar. *J Nephrol Ther.* 2015;05(05).
- 233 17. Salam AA, Alshekteria AA, Alhadi HA, Ahmed M, Mohammed A. Patient satisfaction with  
234 quality of primary health care in Benghazi, Libya. *Libyan Journal of Medicine.* 2010;5(1).

- 235 18. Lok CE, Huber TS, Lee T, Shenoy S, Yevzlin AS, Abreo K, et al. KDOQI Clinical Practice  
236 Guideline for Vascular Access: 2019 Update. American Journal of Kidney Diseases. 2020  
237 Apr 1;75(4):S1–164.
- 238 19. Xue H, Ix JH, Wang W, Brunelli SM, Lazarus M, Hakim R, et al. Hemodialysis access usage  
239 patterns in the incident dialysis year and associated catheter-related complications.  
240 American Journal of Kidney Diseases. 2013 Jan;61(1):123–30.
- 241 20. Noordzij M, Jager KJ, Van Der Veer SN, Kramar R, Collart F, Heaf JG, et al. Use of vascular  
242 access for haemodialysis in Europe: A report from the ERA-EDTA Registry. Nephrology  
243 Dialysis Transplantation. 2014 Oct 1;29(10):1956–64.
- 244 21. Grant IR, Freercks RJ, Honiball EJ, Dube B. Analysis of the vascular access service for  
245 patients on haemodialysis in Livingstone Hospital. Cardiovasc J Afr. 2021;32(2):98–107.  
246
